# Supplementary material
Source: PubMed Central journal article supplement (PMC2373809)
Supplement: rsbl20060559s03.pdf [file rsbl20060559s03.pdf]

1                                   **The impact of climatic variation**  
2                                   **on the opportunity for sexual selection**

3           Sean Twiss, Christopher Thomas, Veronica Poland, Jeff A. Graves & Patrick Pomeroy.

4   **Supplementary Online material.**

5  
6   **BACKGROUND TO GREY SEAL BREEDING BEHAVIOUR:**

7   Approximately 40% of the world's population of grey seals breed around the British  
8   Isles, typically at remote island sites such as North Rona, Scotland (59° 06' N, 05° 50' W),  
9   where adults aggregate to breed each autumn. At North Rona, individual females spend  
10   around 20 days ashore, during which time they each bear and suckle one pup. Females enter  
11   oestrus for approximately 1 day around day 16 of lactation. The breeding season lasts eight  
12   weeks, thus, there is a turnover of females during the season. Males do not defend resources or  
13   actively herd harems, but compete to maintain loose home ranges amongst the groups of  
14   females (Twiss *et al.* 2006).

15           Previous studies of grey seals breeding on North Rona have demonstrated the  
16   importance of fine scale spatial heterogeneity in breeding habitat quality in determining  
17   pupping site preferences of females and therefore seal dispersion patterns on the colony and  
18   longer term patterns of colonisation (Twiss *et al.* 2000, 2001, 2003, Pomeroy *et al.* 2001,  
19   Redman *et al.* 2001). Access to preferred pupping sites confers reproductive benefits in terms  
20   of greater maternal time investment in offspring (Twiss *et al.* 2000, 2001), increased pup  
21   growth rates (Pomeroy *et al.* 2001) and reduced pup mortality (Twiss *et al.* 2003). In  
22   particular, access to small pools of water (size range: 0.01-2.5m<sup>2</sup>) is critical with females

23 travelling long distances to gain access to pools in dry periods (Redman *et al.* 2001), and is  
24 most likely associated with thermal stress and behavioural thermoregulation (Twiss *et al.*  
25 2002). The number and abundance of pools of water increases through the breeding season  
26 as autumnal rainfall (and sea-spray) contributes to the increase in standing water on colony  
27 (measures of pool abundance and size (total area) for four dates spread through the 2002  
28 breeding season correlate well with cumulative rainfall during the breeding season  
29 (abundance:  $r = 0.995$ ,  $p = 0.015$ , area:  $r = 0.997$ ,  $p = 0.003$ )).

30

## 31 **RESULTS**

32 **Table 1:** Summary data for sex ratios, male and female numbers and space use by year.

33  $R$  = Spearman's Rank correlations with rainfall,  $p$  = two-tailed significance,  $p(B)$  = two-  
34 tailed significance with Bonferroni correction for multiple tests.

35

36 Notes: All data are for the period between 1<sup>st</sup> and 25<sup>th</sup> October: (a) Total Rainfall during  
37 October in mm. (b) Number of individually identified males within the study area. (c) Total  
38 number of observed successful copulations. (d) Median duration of male stay ashore in  
39 days. (e) Median size of male home range in m<sup>2</sup>. (f) Mean daily ratio of females per male.  
40 (g) 'Female-days' is the cumulative number of females mapped each day and provides an  
41 accurate index of female numbers. (h) Median female nearest neighbour distance in m  
42 which provides an index of female dispersion patterns. (i) Median of individual female  
43 median daily movements in m. We calculated median distance moved between successive  
44 days for each known female using their daily locations. Collating all known females for  
45 each year provided an overall median measure of daily female movements.

46 **Table 1:**

| Year | Rain <sup>a</sup> | No. males <sup>b</sup> | Total copulations <sup>c</sup> | Male stay <sup>d</sup> | Male home range size <sup>e</sup> | Mean sex ratio <sup>f</sup> | No. female days <sup>g</sup> | Female nearest neighbour distance <sup>h</sup> | Female median daily movement <sup>i</sup> |
|------|-------------------|------------------------|--------------------------------|------------------------|-----------------------------------|-----------------------------|------------------------------|------------------------------------------------|-------------------------------------------|
| 1996 | 211.6             | 104                    | 60                             | 2.5                    | 392.2                             | 6.18                        | 6843                         | 4.13                                           | .                                         |
| 1997 | 55.5              | 141                    | 75                             | 3.0                    | 493.5                             | 6.81                        | 7486                         | 4.08                                           | 10.13                                     |
| 1998 | 152.3             | 153                    | 98                             | 2.0                    | 509.2                             | 6.99                        | 6759                         | 3.88                                           | 8.46                                      |
| 1999 | 132.3             | 126                    | 103                            | 2.0                    | 524.7                             | 6.00                        | 7041                         | 3.66                                           | 7.27                                      |
| 2000 | 190.3             | 133                    | 105                            | 3.0                    | 698.9                             | 8.35                        | 6046                         | 3.81                                           | 5.38                                      |
| 2001 | 179.4             | 114                    | 102                            | 7.0                    | 840.1                             | 7.59                        | 6522                         | 3.52                                           | 6.37                                      |
| 2002 | 91.4              | 110                    | 80                             | 3.0                    | 739.9                             | 8.67                        | 4990                         | 3.96                                           | 7.53                                      |
| 2003 | 76.2              | 109                    | 137                            | .                      | .                                 | 6.42                        | 5906                         | 3.96                                           | .                                         |
| 2004 | 143.6             | 101                    | 129                            | .                      | .                                 | .                           | .                            | .                                              | .                                         |
| R    |                   | -0.12                  | -0.13                          | -0.02                  | -0.07                             | 0.05                        | -0.02                        | -0.20                                          | -0.83                                     |
| p    |                   | 0.71                   | 0.74                           | 0.97                   | 0.88                              | 0.91                        | 0.96                         | 0.63                                           | 0.042                                     |
| p(B) |                   | 1.0                    | 1.0                            | 1.0                    | 1.0                               | 1.0                         | 1.0                          | 1.0                                            | 0.34                                      |

47

48

49 **REFERENCES**

50 Pomeroy, P.P., Worthington-Wilmer, J., Amos, W. & Twiss, S.D. 2001 Reproductive  
51 performance links to fine scale spatial patterns of female grey seal relatedness. *Proc*  
52 *R. Soc Lond. B*, 268, 711-717.

- 53 Redman, P., Pomeroy, P.P. & Twiss, S.D. 2001 Grey seal maternal attendance patterns are  
54 affected by water availability on North Rona, Scotland. *Can. J. Zool.*, 79, 1073-1079.
- 55 Twiss, S.D., Caudron, A., Pomeroy, P.P., Thomas, C.J. & Mills, J.P. 2000 Fine scale  
56 topographical influences on the breeding behaviour of female grey seals. *Anim.*  
57 *Behav.*, 59, 327-338.
- 58 Twiss, S.D., Thomas, C.J. & Pomeroy, P.P. 2001 Topographic spatial characterisation of  
59 grey seal *Halichoerus grypus* breeding habitat at a seal's perceptual spatial grain.  
60 *Ecography*, 24, 257-266.
- 61 Twiss, S.D., Wright, N.C., Dunstone, N., Redman, P., Moss, S. & Pomeroy, P.P. 2002  
62 Behavioral evidence of thermal stress from over-heating in UK breeding gray seals.  
63 *Marine Mammal Science*, 18, 455-468.
- 64 Twiss, S.D., Duck, C. & Pomeroy, P.P. 2003 Grey seal (*Halichoerus grypus*) pup mortality  
65 not explained by local breeding density on North Rona, Scotland. *J Zool Lond.*, 259,  
66 83-91.
- 67 Twiss, S.D., Pomeroy, P.P., Graves, J.A. & Poland, V.F. 2006 Finding fathers - Spatio-  
68 temporal analysis of paternity assignment in grey seals (*Halichoerus grypus*). *Mol.*  
69 *Ecol.*, 15, 1939-1953.
- 70
